# Supplementary material for: The Effect of Oligomerization on A Solid-Binding Peptide Binding to Silica-Based Materials
Source: PubMed Central journal article supplement (PMC7353425; doi:10.3390/nano10061070), 2020-05-30
Supplement: nanomaterials-10-01070-s001.pdf [file nanomaterials-10-01070-s001.pdf]

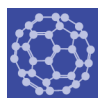

## The effect of oligomerization on a solid-binding peptide binding to silica-based materials

**Rachit Bansal** <sup>1,2</sup>, **Zehra Elgundi** <sup>3</sup>, **Sophia C. Goodchild** <sup>1</sup>, **Andrew Care** <sup>1,2</sup>, **Megan S. Lord** <sup>3</sup>, **Alison Rodger** <sup>1</sup>, and **Anwar Sunna** <sup>1,2,4 \*</sup>

<sup>1</sup> Department of Molecular Sciences, Macquarie University, Sydney, NSW 2109, Australia ; rachit.bansal@hdr.mq.edu.au (R.B); andrew.care@mq.edu.au (A.C); sophia.goodchild@mq.edu.au (S.C.G); alison.rodger@mq.edu.au (A.R); anwar.sunna@mq.edu.au (A.S)

<sup>2</sup> ARC Centre of Excellence for Nanoscale Biophotonics, Macquarie University, Sydney, NSW 2109, Australia

<sup>3</sup> Graduate School of Biomedical Engineering, University of New South Wales, Sydney, NSW 2052, Australia ; z.elgundi@unsw.edu.au (Z.E) ; m.lord@unsw.edu.au (M.S.L)

<sup>4</sup> Biomolecular Discovery Research Centre, Macquarie University, Sydney, NSW 2109, Australia

\* Correspondence: anwar.sunna@mq.edu.au; Tel.: +612-9850-4220

$$\Delta\mathcal{E}_{\text{de-randomised}} = \frac{\Delta\mathcal{E}_{\text{exp}} - \frac{\#_{RC}}{\#_{\text{exp}}} \Delta\mathcal{E}_{RC}}{1 - \frac{\#_{RC}}{\#_{\text{exp}}}} \quad (1)$$

$$\begin{aligned} \Delta\mathcal{E}_{\text{exp}} &= \frac{\#_{\text{de-randomised}} \Delta\mathcal{E}_{\text{de-randomised}} + \#_{RC} \Delta\mathcal{E}_{RC}}{\#_{\text{de-randomised}} + \#_{RC}} = \frac{\#_{\text{de-randomised}} \Delta\mathcal{E}_{\text{de-randomised}} + \#_{RC} \Delta\mathcal{E}_{RC}}{\#_{\text{exp}}} \\ \Delta\mathcal{E}_{\text{exp}} (\#_{\text{de-randomised}} + \#_{RC}) &= \#_{\text{de-randomised}} \Delta\mathcal{E}_{\text{de-randomised}} + \#_{RC} \Delta\mathcal{E}_{RC} \\ \Delta\mathcal{E}_{\text{de-randomised}} &= \frac{\Delta\mathcal{E}_{\text{exp}} (\#_{\text{de-randomised}} + \#_{RC}) - \#_{RC} \Delta\mathcal{E}_{RC}}{\#_{\text{de-randomised}}} \\ &= \frac{\#_{\text{exp}} (\Delta\mathcal{E}_{\text{exp}} - \frac{\#_{RC}}{\#_{\text{exp}}} \Delta\mathcal{E}_{RC})}{\#_{\text{exp}} - \#_{RC}} \\ &= \frac{\Delta\mathcal{E}_{\text{exp}} - \frac{\#_{RC}}{\#_{\text{exp}}} \Delta\mathcal{E}_{RC}}{1 - \frac{\#_{RC}}{\#_{\text{exp}}}} \end{aligned}$$

**Equation S1.** Derivation of Equation (1) of main text where  $RC$  denotes random coil,  $\#$  denotes number of residues,  $\text{exp}$  denotes the full protein on which data were collected, and  $\text{de-randomised}$  denotes the core of the protein when the linkers and any extra unfolded residues are removed.

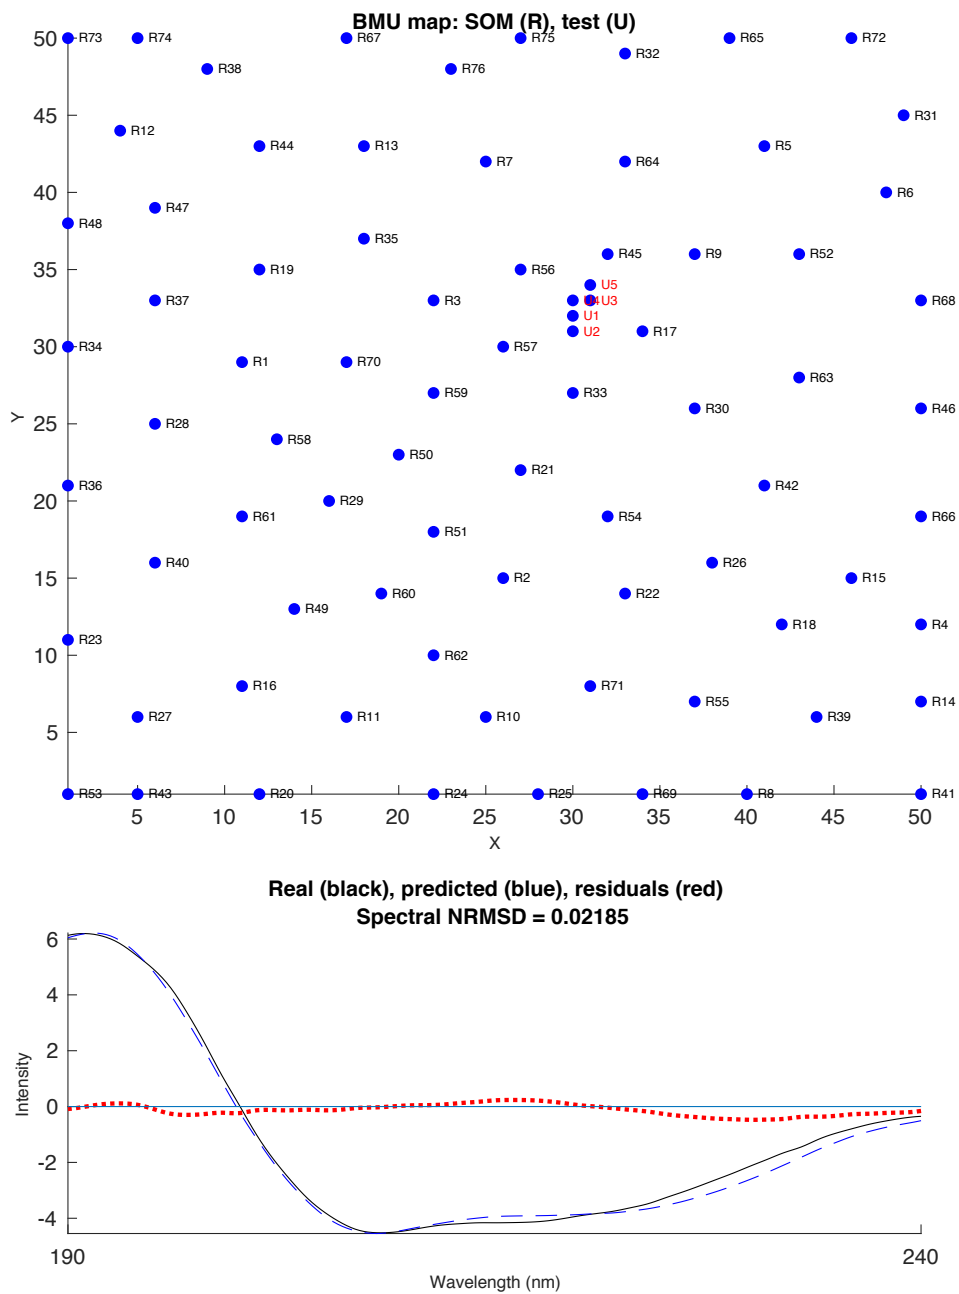

(a)

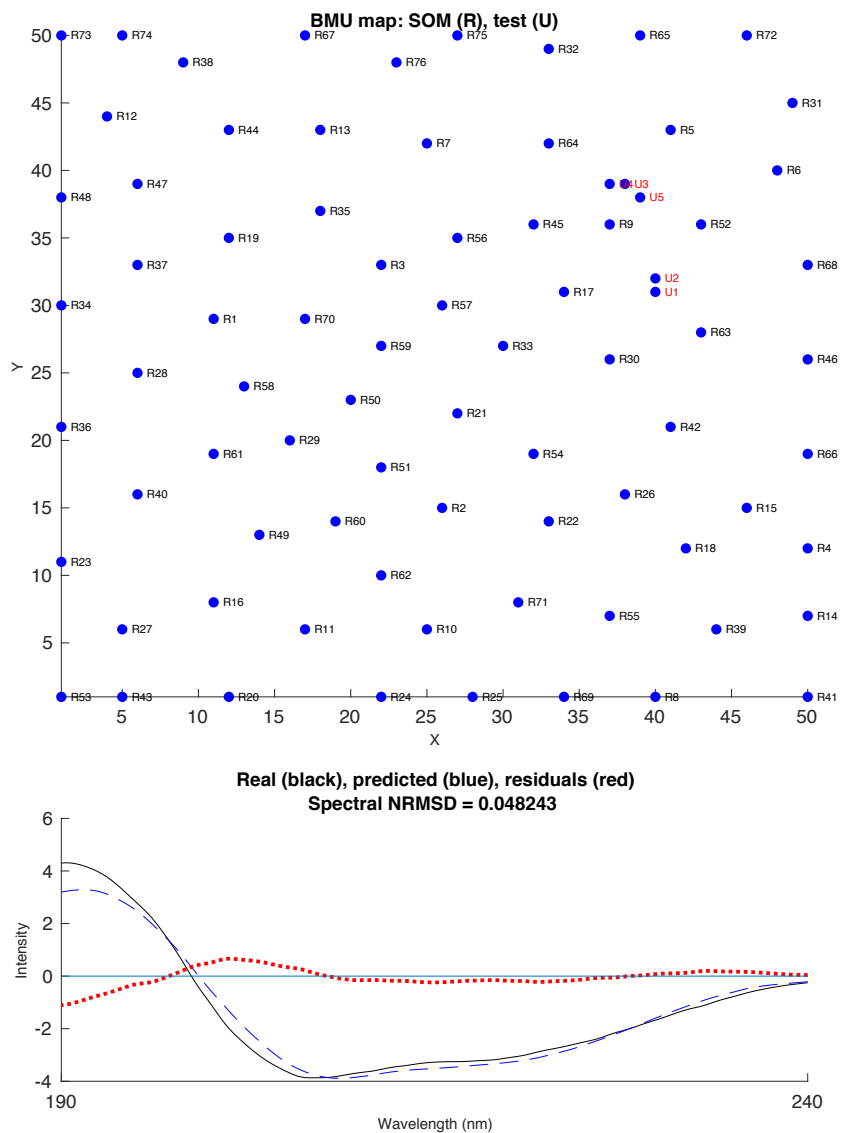

(b)

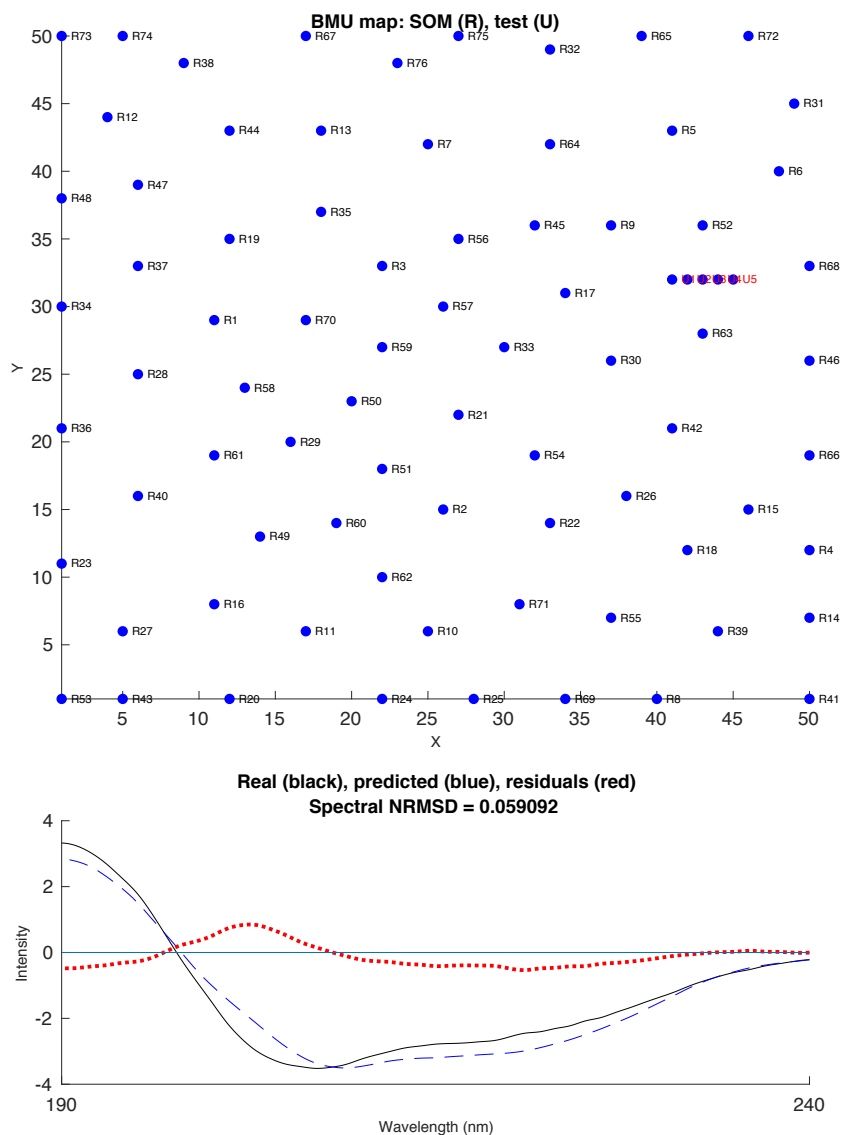

(c)

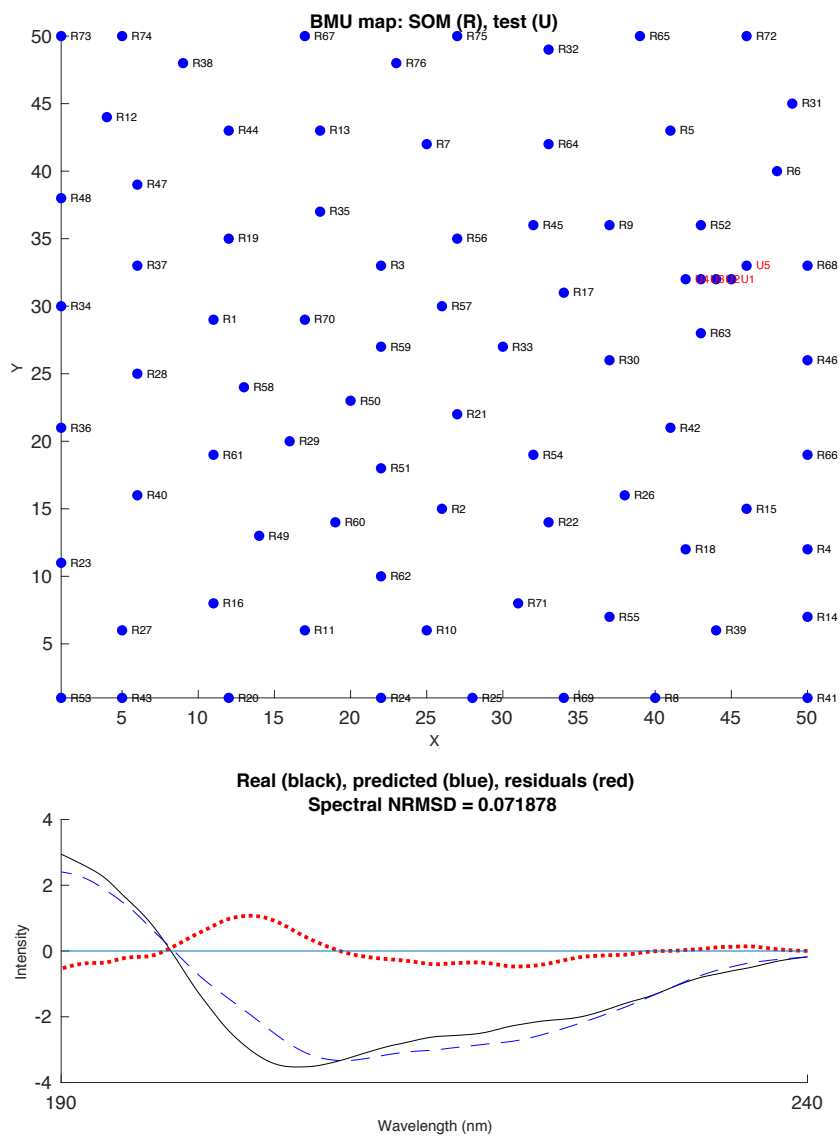

(d)

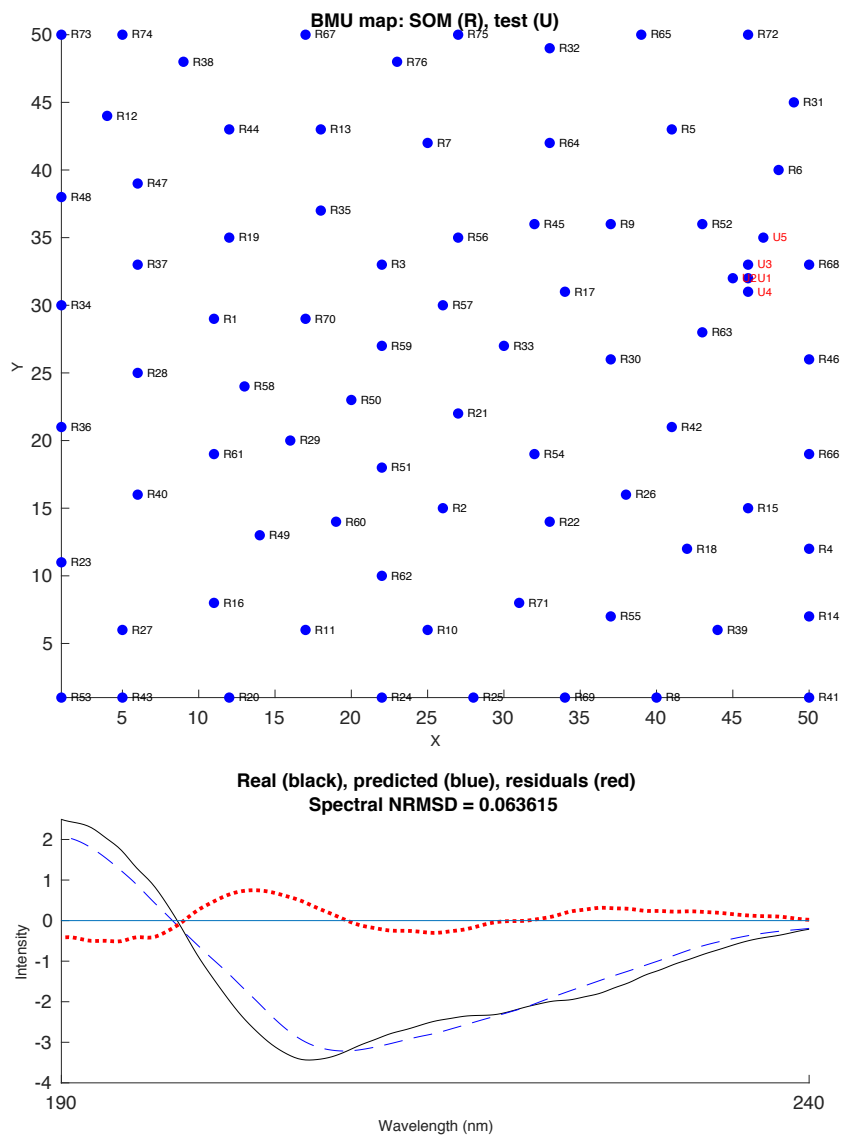

(e)

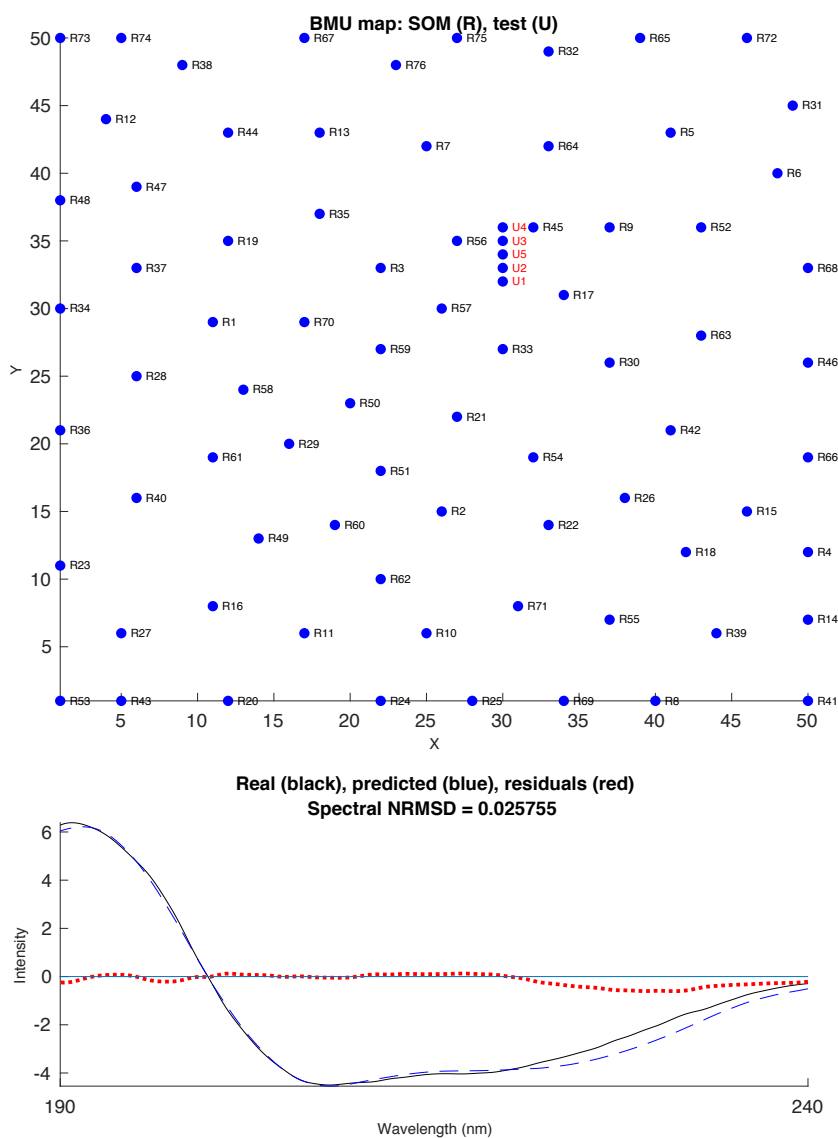

(f)



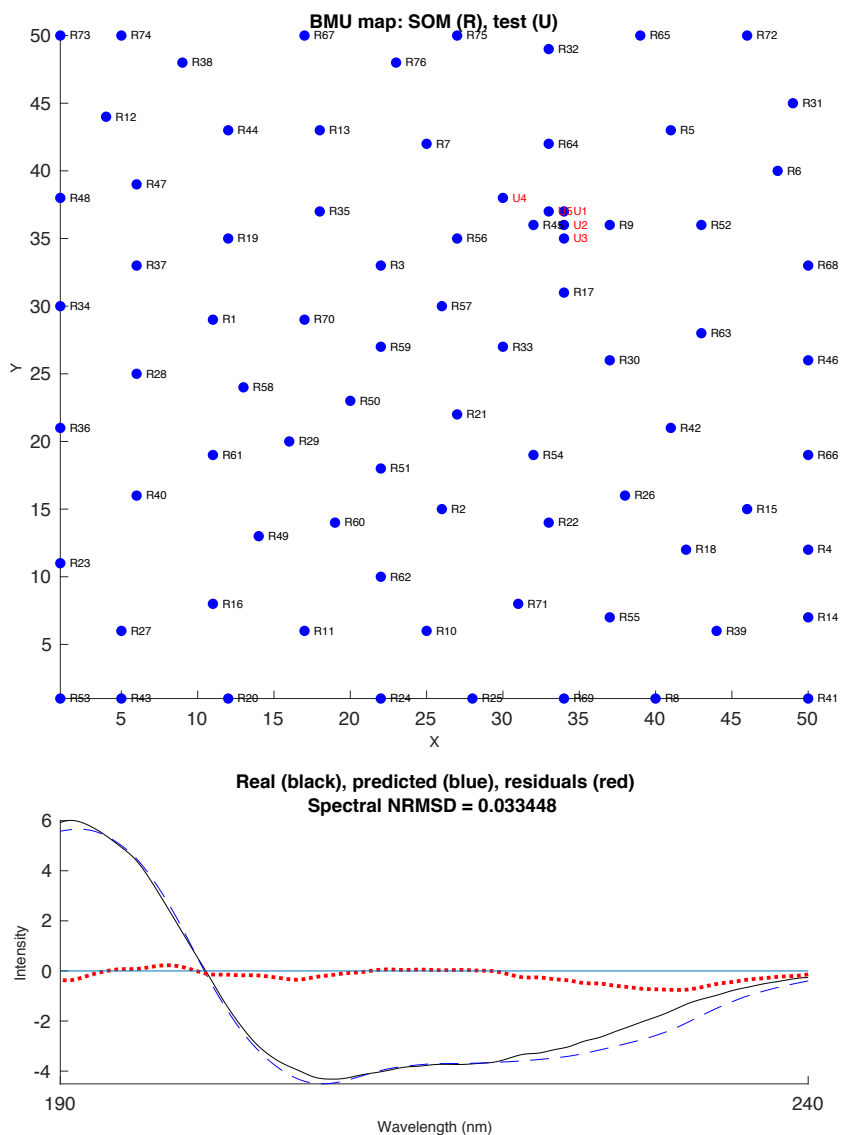

(g)

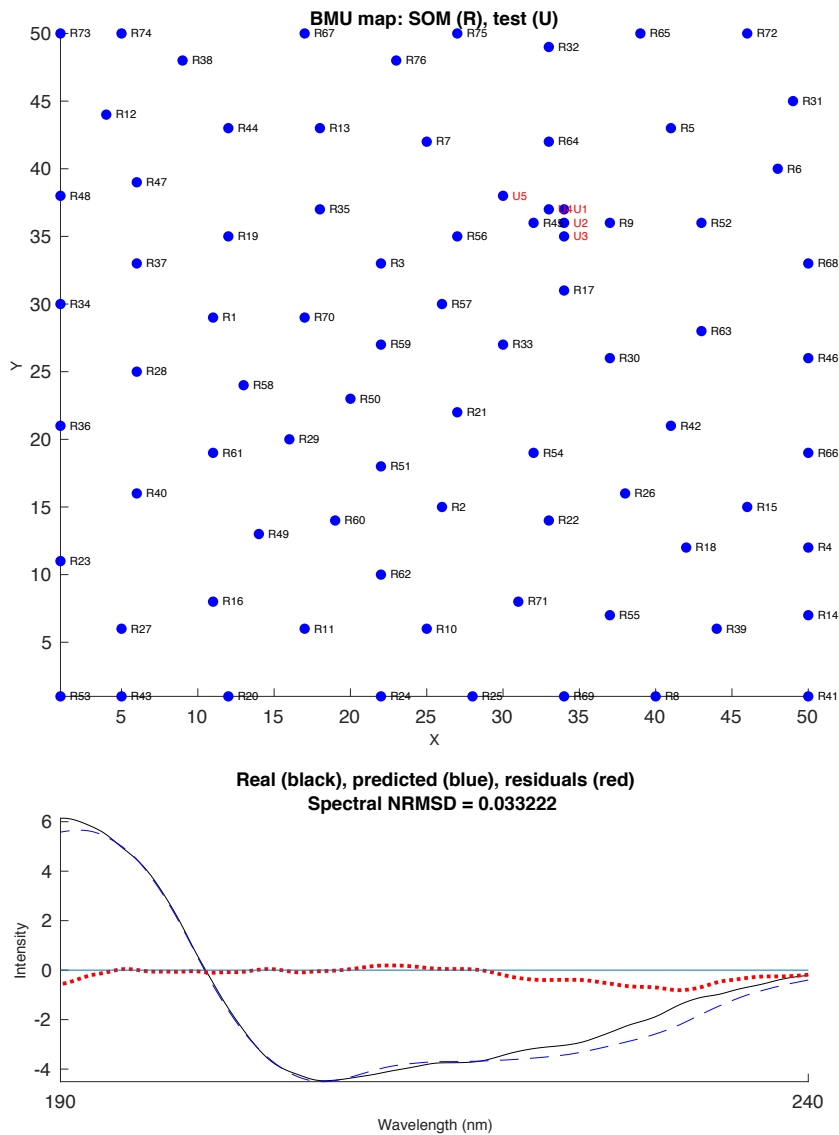

(h)

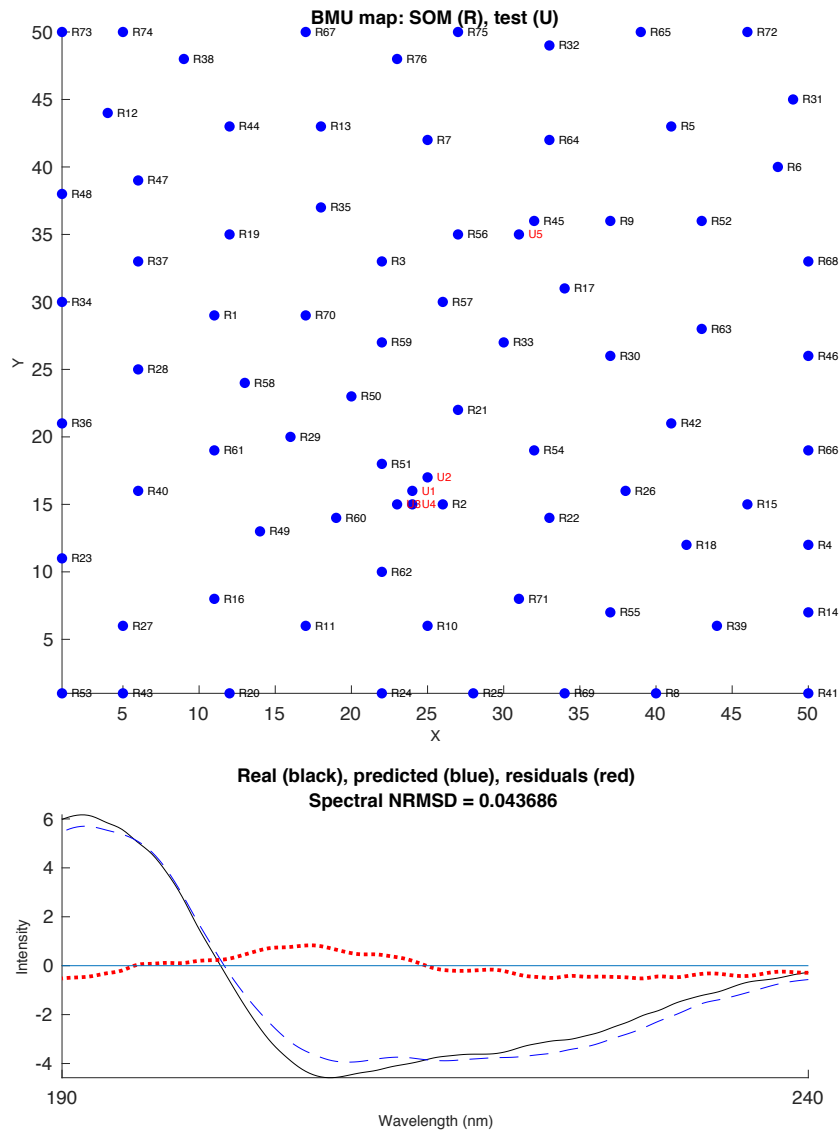

**Figure S1.** SOMSpec output for (a) PG, (b) 1×LPG, (c) 2×LPG, (d) 3×LPG, (e) 4×LPG, (f) 1×LPG–0.22 random coil, (g) 2×LPG–0.31 random coil, (h) 3×LPG–0.36 random coil, (i) 4×LPG–0.40 random coil

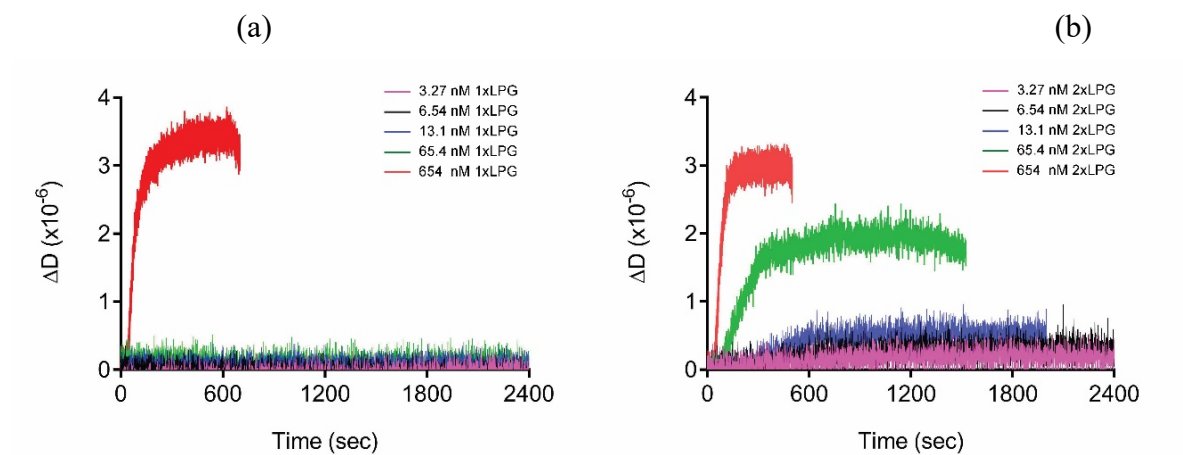

**Figure S2.**  $\Delta D$  vs time for the 3<sup>rd</sup> overtone of the absorbed (a) 1xLPG and (b) 2xLPG on silica coated QCM-D crystals at various concentrations (3.27–654 nM). The measurement was performed in three steps at a flow rate of 150  $\mu\text{L}/\text{mL}$ : baseline formation (1  $\times$  PBS buffer), adsorption of protein samples until saturation, and washing (1  $\times$  PBS buffer) to remove of unbound protein. Three independent measurements were performed for each concentration.

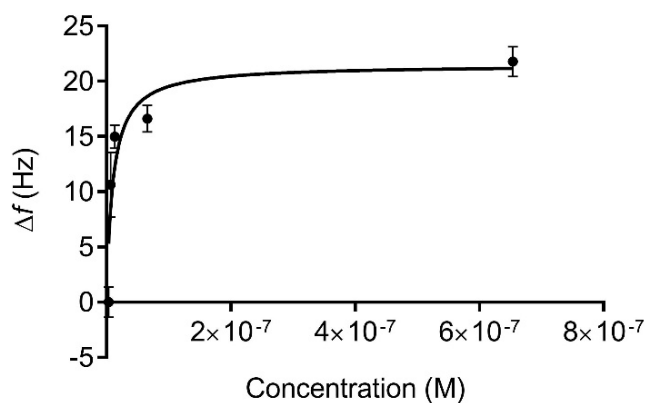

**Figure S3.** Langmuir adsorption isotherm for the adsorption of 3xLPG to silica surface. The data were fitted as per a single-site specific binding model, giving a binding affinity/equilibrium dissociation constant ( $K_D$ ) =  $53.23 \pm 4.5$  nM.

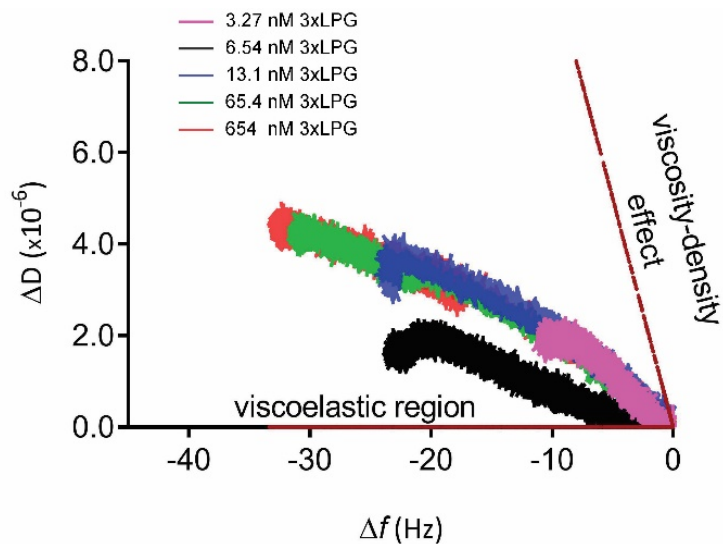

**Figure S4.** Df plot for the binding of 3xLPG to silica . The dotted lines indicate the pure elastic mass and viscosity-density responses indicating the data lie within the viscoelastic region.

**Supplementary Table S1.** Truncated derivatives of 4×LPG with different linker repeats and their physicochemical properties.

|                      | Mw (kDa) <sup>a</sup> | pI <sup>b</sup> | Charge <sup>c</sup> | GRAVY <sup>d</sup> |
|----------------------|-----------------------|-----------------|---------------------|--------------------|
| <i>Protein</i>       |                       |                 |                     |                    |
| PG                   | 21.363                | 4.58            | -14.0               | -0.56              |
| 1×LPG                | 23.443                | 4.69            | -13.8               | -0.69              |
| 2×LPG                | 25.797                | 4.94            | -10.5               | -0.78              |
| 3×LPG                | 28.151                | 5.25            | -7.3                | -0.85              |
| 4×LPG                | 30.504                | 5.80            | -4.1                | -0.91              |
| <i>Linker region</i> |                       |                 |                     |                    |
| <i>without PG</i>    |                       |                 |                     |                    |
| 1×L                  | 3.232                 | 10.94           | 3.2                 | -1.27              |
| 2×L                  | 5.586                 | 11.38           | 6.4                 | -1.43              |
| 3×L                  | 7.939                 | 11.50           | 9.6                 | -1.50              |
| 4×L                  | 10.293                | 11.57           | 12.9                | -1.54              |

<sup>a</sup> Theoretical molecular weight (Mw)\*

<sup>b</sup> Theoretical isoelectric point (pI)\*

<sup>c</sup> Theoretical charge at pH 7.0\*

<sup>d</sup> Theoretical grand average hydrophobicity (GRAVY)<sup>†</sup>

\* Values calculated using Protein calculator v3.4 (<http://protcalc.sourceforge.net/>)

<sup>†</sup> Values calculated using Protein GRAVY

([https://www.bioinformatics.org/sms2/protein\\_gravy.html](https://www.bioinformatics.org/sms2/protein_gravy.html))
